# Supplementary material for: Circular RNA circLDLR facilitates cancer progression by altering the miR-30a-3p/SOAT1 axis in colorectal cancer
Source: PubMed Central journal article supplement (PMC9276972; doi:10.1038/s41420-022-01110-5), 2022-07-11
Supplement: 41420_2022_1110_MOESM15_ESM.pdf [file 41420_2022_1110_MOESM15_ESM.pdf]

6.7-Wang

1 **Circular RNA circDLR facilitates cancer progression by altering the**  
2 **miR-30a-3p/SOAT1 axis in colorectal cancer**

3 Ruoqin Wang<sup>1,2,4</sup>, Jiayu Wang<sup>1,2</sup>, Yanjun Chen<sup>1,2</sup>, Yuqi Chen<sup>1,2</sup>, Qinhua Xi<sup>2</sup>, Linqing  
4 Sun<sup>1,2</sup>, Xueguang Zhang<sup>1,3,5</sup>, Guangbo Zhang<sup>1,3,5</sup>, Xianglin Ding<sup>6,\*</sup>, Tongguo Shi<sup>1,3,</sup>  
5 <sup>4,5,\*</sup>, Weichang Chen<sup>1,2,3,4,5,\*</sup>

6 <sup>1</sup>Jiangsu Institute of Clinical Immunology, The First Affiliated Hospital of Soochow  
7 University, 178 East Ganjiang Road, Suzhou, China.

8 <sup>2</sup>Department of Gastroenterology, The First Affiliated Hospital of Soochow University,  
9 188 Shizi Road, Suzhou, China.

10 <sup>3</sup>Jiangsu Key Laboratory of Clinical Immunology, Soochow University, 178 East  
11 Ganjiang Road, Suzhou, China.

12 <sup>4</sup>Suzhou <sup>12</sup>Key Laboratory for Tumor Immunology of Digestive Tract, The First  
13 Affiliated Hospital of Soochow University, 178 East Ganjiang Road, Suzhou, China.

14 <sup>5</sup>Jiangsu Key Laboratory of Gastrointestinal Tumor Immunology, The First Affiliated  
15 Hospital of Soochow University, 178 East Ganjiang Road, Suzhou, China.

16 <sup>6</sup>Department of Gastroenterology Suzhou Yongding Hospital, 1388 Gaoxin Road,  
17 Suzhou, China.

18 \*Corresponding Author:

19 <sup>9</sup>Weichang Chen, Mailing address: 50 Donghuan Road, Suzhou, Jiangsu Province,  
20 215100, China; Phone: +86(512)67781318; Email: weichangchen@126.com

21 Tongguo Shi, Mailing address: 178 East Ganjiang Road, Suzhou, Jiangsu  
22 Province, 215213, China.; Phone: +86(512)65125011; Email: shitg@suda.edu.cn

23 Xianglin Ding, Mailing address: 1388 Gaoxin Road, Suzhou, Jiangsu  
24 Province,215299, China.; Phone:+86(512)63180205; Email:Darnic5911@163.com

25

26 **Abstract**

27 Colorectal cancer (CRC) is the third most common malignancy worldwide. Circular  
28 RNAs (circRNAs) have been reported to play critical regulatory roles in  
29 tumorigenesis, serving as tumor biomarkers and therapeutic targets. However, the  
30 contributions of circRNAs to CRC tumorigenesis are unclear. In our study, high  
31 expression of circLDLR was found in CRC tissues and cells and was closely  
32 associated with the malignant progression and poor prognosis of CRC patients. We  
33 demonstrated that circLDLR boosts growth and metastasis of CRC cells in vitro and  
34 in vivo, and modulates cholesterol levels in vitro. Mechanistically, we showed that  
35 circLDLR competitively binds to miR-30a-3p and prevents it from reducing the  
36 SOAT1 level, facilitating the malignant progression of CRC. In sum, our findings  
37 illustrate that circLDLR participates in CRC tumorigenesis and metastasis via the  
38 miR-30a-3p/SOAT1 axis, serving as a potential biomarker and therapeutic target in  
39 CRC.

40 **Keywords:** colorectal cancer, circLDLR, miR-30a-3p, SOAT1

41

42

43

44

## Introduction

Colorectal cancer (CRC) is one of the most common tumors and the leading cause of cancer-related death all over the world [1]. In spite of great improvements in therapeutic strategies, including colectomy, chemotherapy and immunotherapy, the high frequencies of recurrence and metastasis make CRC a serious menace to human health [2, 3]. CRC diagnosed at an advanced stage, particularly distant metastasis patients, remain a low 5-year survival rate [4, 5]. Thus, discovering new biomarkers for early diagnosis, precise metastasis prediction and prognosis is needed.

As a kind of abundant and ubiquitous noncoding RNAs, circular RNAs (circRNAs) have single-stranded closed-loop structures [6]. Accompanied by the continuous technical advance of the next-generation sequencing, circRNAs are potentiality for serving as tumor biomarkers and curative targets in the clinic [7]. Recently, literature have demonstrated that circRNAs partake in regulating miscellaneous tumor biological processes, such as invasion, metastasis, proliferation, tumor angiogenesis, drug resistance and cancer metabolism [8]. For example, circ-ERBIN is highly expressed and facilitates the proliferation, migration and metastasis in CRC [9]. Knockdown of circHIPK3 effectively inhibits various biological functions in CRC cells by sponging miR-7, such as proliferation, migration, and invasion [10]. Lei et al. noted that circCUL2 activated autophagy in a miR-142-3p/ROCK2 axis-dependent manner, and functioned as a tumor suppressor and regulator of resistance to cisplatin [11]. Moreover, circ-PVT1 activates miR-106a-5p/HK2 signaling, regulating biological processes, such as growth and metastasis, as well as glycolytic metabolism

67 in oral squamous cell carcinoma [12]. However, there is still no universally accepted  
68 explanation for how key differential circRNAs regulate CRC progression and  
69 metastasis.

70 In this work, we scouted the results of ribosomal RNA-depleted RNA-sequencing  
71 data for five CRC patients and focused on a circular RNA (circ\_0006877) stemmed  
72 from the LDLR gene, labeled as circLDLR. And circLDLR was obviously boosted in  
73 both CRC tissues and CRC cell lines, and it was associated with a poor prognosis in  
74 CRC patients. Moreover, circLDLR was identified as a key regulator in CRC. In  
75 vitro and in vivo experiments displayed that it modulates CRC proliferation and  
76 metastasis. Our mechanistic study evidenced that circLDLR deeds as a blocker for  
77 miR-30a-3p to modulate the level of sterol O-acyltransferase 1 (SOAT1), further  
78 facilitating the tumorigenesis of CRC. Therefore, circLDLR has the potential to  
79 become promising therapeutic target for CRC.

## 80 **Materials and methods**

### 81 **Human CRC tissue specimens**

82 Five CRC tissue samples and paired adjacent normal tissue samples were obtained  
83 from patients who received surgery at the First Affiliated Hospital of Soochow  
84 University (Suzhou, China). We received approval from the Moral Principle Board of  
85 the First Affiliated Hospital of Soochow University before we collected the samples  
86 (2020084). Informed consent was signed by each CRC patient. Detailed  
87 clinicopathological characteristics of these patients are described in Supplementary  
88 Table S1.

89 **Cell lines and cell cultures**

90 The human HEK293T cells, normal colonic epithelial cell line NCM-460, and human  
91 CRC cell lines (HCT116, HT29, RKO, SW620, HCT8, LoVo, SW480, and Caco-2)  
92 were purchased from American Type Culture Collection (ATCC, USA). DMEM  
93 (Eallbio, Beijing, China), containing 10% fetal bovine serum (FBS, Eallbio) and 1%  
94 penicillin-streptomycin (Beyotime, Shanghai, China, #C0222), was used for all cells  
95 maintain in a humidified incubator with 5% CO<sub>2</sub> at 37°C.

96 **Nucleic acid preparation and quantitative real-time polymerase chain reaction**  
97 **(qRT-PCR)**

98 TRIzol reagent (Vazyme, Nanjing, China, #R401-01) was adopted to elicit total RNA  
99 from tissues or cultured cells. We extracted the nuclear and cytoplasmic fractions with  
100 Minute Cytoplasmic & Nuclear Extraction Kits for Cells (Invent Biotechnologies, Inc.,  
101 Plymouth, MN, USA, #SC-003). Isolated RNA was used for reverse transcription  
102 with MonScript RT Super Mix with dsDNase (Monad, Wuhan, China, #MR05201) in  
103 the light of the manufacturer's manual. We performed the quantitative PCR with  
104 SYBR green using the ChemoHS qPCR Mix kit (Monad, Wuhan, China, #MQ00401)  
105 on a CFX96 Touch Real-Time-PCR system (Bio-Rad, CA, USA) in the light of the  
106 manufacturer's manual. We performed expression analysis with specific primers for  
107 each gene, which are shown in Table S2 in Supplementary materials.

108 **RNase R treatment**

109 We incubated total RNA from CRC cells with RNase R (Epicentre Technologies,  
110 USA). The condition of incubation with RNase R was at a concentration of 3u /mg at

111 37°C for 30 min in accordance with the manufacturer's protocol. We detected the  
112 stability of circLDLR and LDLR mRNA (mLDLR) using qRT-PCR.

### 113 Actinomycin D assay

114 RKO cells were forced on equally in 6-well plates ( $5 \times 10^5$  cells per well). We handled  
115 cells with 2 µg/ml actinomycin D (MCE, HY-17559) for several specific times (0 h, 4  
116 h, 8 h, 12 h or 24 h). Then, we reaped the cells and used them to analyze the mRNA  
117 contents of the linear and circular forms of the LDLR gene using qRT-PCR. Then, we  
118 normalized the expression of mRNA to the values measured in the 0 h group.

### 119 Fluorescence in situ hybridization (FISH)

120 Cy3-labeled circLDLR probes (Geneseed, Guangzhou, China) and FAM-labeled  
121 miR-30a-3p probes (GenePharma, Shanghai, China) were used for the detection of the  
122 colocalization of circLDLR and miR-30a-3p in CRC cells. We marked cell nuclei  
123 using 4,6-diamidino-2-phenylindole (DAPI, #C1002). The Fluorescent In Situ  
124 Hybridization Kit (RiboBio, Guangzhou, China, #C10910) were utilized to discover  
125 the signals of the probes in the light of the manufacturer's instructions. Briefly, cells  
126 ( $1 \times 10^5$ ) were kept in 15 mm cell culture dishes with glass-bottom. The next day, we  
127 used 4% paraformaldehyde to fix the cells at room temperature for 10 min,  
128 permeabilized the cells in Triton X-100 (0.5%) for 5 min at 4°C. Then we rinsed them  
129 in PBS. All the reagents were RNase-free. After incubating the cells for 30 min at  
130 37°C in prehybridization buffer, we hybridized them with the probes in the  
131 hybridization buffer (1:50) overnight. Next, the cells were washed in different  
132 washing buffers in order, and the nuclei were stained with DAPI following the

133 manufacturer's protocol. We acquired all images on a confocal laser scanning  
134 microscope (Olympus FLUOVIEW FV1000).

#### 135 **Cell viability**

136 To evaluate the proliferation of CRC cells, Cell Counting Kit-8 (CCK-8, NCM,  
137 Suzhou, China, #C6005) was applied. In the CCK-8 experiment, we cultured  
138 transfected CRC cells into a well of 96-well plate at a concentration of 5000 cells. At  
139 the same time every day, we added ten microliters of CCK-8 solution into each well,  
140 and the absorbance value was quantified at 450 nm as a reference.

#### 141 **5-Ethynyl-2'-deoxyuridine (EdU) incorporation assay**

142 To perform the EdU experiment, we used the BeyoClick™ EdU Cell Proliferation Kit  
143 with Alexa Fluor 555 (Beyotime, #C0075S) in the light of the manufacturer's protocol.  
144 In Brief, we seeded cells ( $1 \times 10^5$ ) in 15 mm glass-bottom cell culture dishes. The next  
145 day, we incubated the cells with 10  $\mu$ M EdU working solution and cultured them at  
146 37°C with 5% CO<sub>2</sub> for 2 h. After fixed in paraformaldehyde (4%), the cells were  
147 permeabilized in 0.3% Triton X-100 and washed them in 3% BSA. Finally, we  
148 incubated the cells with Click Additive Solution and Hoechst 33342 in the light of the  
149 manufacturer's manual. Using a confocal laser scanning microscope (Olympus  
150 FLUOVIEW FV1000), we obtained all images. Finally, we calculated the percentage  
151 of EdU incorporation (DNA Synthesis) to evaluate cell proliferation.

#### 152 **Transwell migration and invasion assays**

153 To carry out the migration assay, we resuspended cells ( $4 \times 10^5$  cells) in medium  
154 without FBS and added them to the upper chamber in a 24-well plate with the pore of



155 8  $\mu\text{m}$  (BD Biosciences, NJ, USA, #353097). To perform the invasion assay, we coated  
156 the upper chambers with 100  $\mu\text{l}$  of diluted Matrigel (200  $\mu\text{g}/\text{ml}$ , Corning, Shanghai,  
157 China, #356234) for 2 h. Then we filled the bottom chamber with 800  $\mu\text{l}$  of cell  
158 culture medium supplemented with 20% FBS as the attractant. After incubating the  
159 cells for 24 h, we fixed the cells with 4% paraformaldehyde for 15 min, which were  
160 remained on the bottom surface of the upper chamber. Then we stained these cells for  
161 15 min with crystal violet (Beyotime, #C0121). Finally, we imaged the cells on the  
162 lower side of the chamber membrane and counted them under an inverted microscope.

### 163 Analysis of cellular cholesterol levels

164 The low-density lipoprotein cholesterol (LDL-C) and total cholesterol (T-CHO) kits  
165 (Nanjing Jiancheng Bioengineering Institution, Nanjing, China, #A111-1-1,  
166 #A113-1-1) were used to measure the contents of T-CHO and LDL-C in CRC cells.

### 167 Cell transfection and infection

168 Human CRC cell lines were cultured in a 6-well plate at 37°C in a humidified 5%  
169 CO<sub>2</sub> atmosphere overnight. CircLDLR-specific siRNA (siRNA-1, -2, -3, -4 and -5),  
170 miRNA mimics and miRNA inhibitors (GenePharma) were transfected with  
171 Lipofectamine 2000 (Invitrogen, USA) in the light of the manufacturer's protocol.  
172 Lentiviruses carrying a circLDLR overexpression vector or short hairpin RNA  
173 (shRNA) containing the sequence of circLDLR siRNA-2 was obtained from  
174 Geneseeed (Guangzhou, China). We used an empty backbone vector as a control.  
175 When CRC cells grew to 30% confluence, lentiviral particles (MOI: 20) were used to  
176 infect them. We verified the effectiveness of overexpression or interference by

177 fluorescence microscopy and qRT-PCR after 72 h.

#### 178 **RNA Immunoprecipitation (RIP) assays**

179 CRC cells ( $3 \times 10^7$ ) were cumulated and lysed using RIP lysis. The lysis buffer  
180 contained 2.5 mM MgCl<sub>2</sub>, 60 U/ml Superase-In (Ambion, #AM2694), 20 mM Tris,  
181 500 mM NaCl, 2% SDS, 1 mM DTT (Sigma, #43816), and protease inhibitors  
182 (Biotool, #B14001). Then, we subjected the lysates to sonication, and incubated the  
183 supernatants with an anti-AGO2 antibody (Proteintech, Wuhan, China, #10686-1-AP)  
184 or IgG overnight at 4°C. Then, we added Protein A/G beads (MedChemExpress,  
185 Monmouth Junction, NJ, USA, #HY-K0202) for incubation at 4°C for a further 3 h.  
186 After washing the protein with washing buffer (PBS, 0.5% Triton X-100, pH 7.4), we  
187 then purified the immunoprecipitated RNAs using TRIzol and assessed by qRT-PCR  
188 analysis.

#### 189 **RNA pull-down assay**

190 Biotinylated circLDLR were designed and synthesized (GenePharma, Shanghai,  
191 China). We harvested approximately  $3 \times 10^7$  circLDLR-overexpressing CRC cells, then  
192 lysed and sonicated them for further experiments. We incubated the biotinylated  
193 circLDLR probe with C-1 magnetic beads (Invitrogen) and cultured them at room  
194 temperature for 1 h, generating probe-coated beads. Then, we incubated cell lysates  
195 with the circLDLR probe at 4°C overnight, using oligo probe as control. After  
196 washing beads with wash buffer, we eluted and extracted the RNA transcripts bound  
197 to the beads with TRIzol for analysis.

#### 198 **Luciferase reporter assay**

199 We seeded HEK293T cells ( $3 \times 10^5$ ) in 6-well plates, and cotransfected them with a  
200 mixture of miRNA mimics and luciferase reporter plasmid (1  $\mu$ g) using  
201 Lipofectamine 2000 transfection reagent. 48 h later, we washed the cells with PBS  
202 and lysed them in Promega Passive Lysis Buffer. Then, we measured the luciferase  
203 activities by the Dual Luciferase Reporter Assay System (Promega, Madison, USA,  
204 #E1910) following the manufacturer's instructions. Finally, we normalized the  
205 luciferase values and calculated relative luciferase activity.

### 206 Western blot analysis

207 Our team drew proteins with RIPA lysis buffer (Beyotime, #P0013B) adding protease  
208 inhibitors (Beyotime, #P1045). Utilizing a BCA protein assay kit (Beyotime, #P0010),  
209 we determined the concentrations of proteins. Then, total proteins (30  $\mu$ g) were  
210 separated by electrophoresis using the 10% ExpressCast PAGE Kit (NCM, Suzhou,  
211 China, #P2012) and transferred to PVDF membranes (GE Healthcare Life Science,  
212 Germany). We used 5% BSA (Fcmacs, Nanjing, China, #FMS-WB021) to block the  
213 membranes with for about 1 h, then incubated them with primary antibodies at 4°C  
214 overnight. We used the primary antibodies anti-GAPDH (Abclonal, Wuhan, China,  
215 #AC035) and anti-SOAT1 (CST, Beverly, Ma, USA, #35695S) in the light of the  
216 manufacturer's manuals. After the membranes marking using a secondary antibody  
217 for 1 h, we obtained images utilizing Imaging Systems of Bio-Rad ChemiDoc™ MP.

### 218 Animal experiments

219 In vivo experiments were authorized by the Institutional Animal Care and Use  
220 Committee of Soochow University (Suzhou, China; SUDA20210918A02). Animal

221 <sup>80</sup> care and all experimental procedures were in the light of institutional ethical  
222 guidelines for animal experiments. Stable circLDLR-overexpressing or  
223 circLDLR-knockdown CRC cells and corresponding control cells were harvested and  
224 suspended in PBS. Each BALB/c nude mouse (six weeks old, female) was implanted  
225 subcutaneously with  $5 \times 10^6$  cells in the right flank. The mice were monitored every  
226 other day to measure tumor weight and tumor volume. About 3 weeks after injection,  
227 we sacrificed the mice, then dissected and weighed the tumors. To build a metastasis  
228 model, <sup>16</sup> 7-week-old BALB/c nude mice (female) were administered stable  
229 circLDLR-overexpressing or circLDLR-knockdown CRC cells ( $2 \times 10^6$  cells per  
230 mouse) via tail intravenous injection. After forty days, the lungs were surgically  
231 removed. Then, we fixed the lungs in 4% paraformaldehyde, then stained them with  
232 hematoxylin and eosin (HE). Lung metastatic foci were counted by two experienced  
233 pathologists.

234 **Hematoxylin and eosin (HE) staining and immunohistochemistry (IHC) analysis**<sup>1</sup>  
235 Paraffin sections (5- $\mu$ m thick) from mouse tumor or lung tissues were used for HE  
236 and IHC analyses. HE staining was conducted following the manufacturer's  
237 instructions (Beyotime, #C0105). IHC analysis was conducted as described  
238 previously [13, 14]. Sections were processed and stained with an anti-Ki-67 antibody  
239 (BOSTER, California, USA, #BM4381, 1:50), anti-<sup>2</sup>CD31 antibody (Abcam,  
240 Cambridge, MA, USA, #ab32457, 1:1500) or anti-SOAT1 antibody (CST, Beverly,  
241 Ma, USA, #35695S, 1:50).

242

243 **Statistical analysis**

244 <sup>35</sup> GraphPad Prism version 6.0 (GraphPad Software, La Jolla, CA, USA) and SPSS  
245 version 26.0 <sup>6</sup> (IBM Corp., Armonk, NY, USA) were adopted for statistical analysis.  
246 Overall survival comparisons were conducted by the <sup>53</sup> log-rank (Mantel–Cox) test for  
247 Kaplan–Meier plots. The relationship between circLDLR and patient characteristics  
248 was **detected** using the chi-squared test. <sup>25</sup> Data are presented as the mean ± standard  
249 deviation (SD). Intergroup differences were analyzed by Student’s t test or one-way  
250 ANOVA. <sup>1</sup> P values of < 0.05 were considered statistically significant.

251 **Results**

252 **CircLDLR is upregulated in CRC tissues and positively associated with a poor**  
253 **prognosis in CRC patients.**

254 We first <sup>61</sup> performed RNA-seq analysis of ribosomal RNA-depleted total RNA **from**  
255 **five clinic CRC tissue samples and the normal paired adjacent tissue samples. Then,**  
256 **we obtained the constructed circRNA profiling database, and we found that the**  
257 **detected circRNAs’ length was mostly less than 1000 nucleotides (Fig. 1a). In total,**  
258 **differentially expressed 411 circRNAs (P < 0.05 and fold change > 2.0) were**  
259 **identified in the CRC tissues relative to the adjacent normal tissues (Fig. 1b). Among**  
260 **these circRNAs, 184 were significantly elevated, and 277 were lessed (Fig. 1b, c,**  
261 **Supplementary Fig. S1). Next, we put attention to the upregulated circRNA**  
262 **hsa\_circ\_0006877, which termed circLDLR in the remainder of the article and is**  
263 **assumed to be derived from the <sup>84</sup> low-density lipoprotein receptor (LDLR) gene.**  
264 Although circLDLR did not have the highest fold change value and P value among

265 the 184 upregulated circRNAs in the circRNA profiling, compared with other  
266 up-regulated circRNAs, <sup>27</sup> the expression of circLDLR in 5 pairs of tissues has a better  
267 consistency. The expression of circLDLR was re-examined in 80 human CRC and 15  
268 normal tissue specimens. <sup>44</sup> As Fig. 1d displayed, the expression of circLDLR was  
269 obviously higher in CRC tissues than that in the adjacent tissues. Moreover, we  
270 observed that the circLDLR level of most CRC cell lines tested (HCT116, SW480,  
271 SW620, RKO, HCT8, HT29, LoVo and Caco-2) was higher <sup>32</sup> than that of the colonic  
272 epithelial cell line NCM-460 (Fig. 1e).

273 Next, we investigated the relationships between clinicopathological characteristics  
274 and circLDLR expression in CRC patients. Correlation analysis manifested the  
275 <sup>34</sup> expression of circLDLR was markedly related to the TNM stage of  
276 clinicopathological parameter (Supplementary Table S3). Besides, CRC patients who  
277 had higher circLDLR expression had poorer overall survival (OS) (Fig. 1g). Overall,  
278 our data show that circLDLR is abnormally expressed in CRC tissues and cell lines, <sup>32</sup>  
279 has a positive relation to the poor prognosis of CRC patients.

#### 280 **Characterization of circLDLR**

281 CircLDLR, a predicted length of 295 nt, arises from exons 13 and 14 of the LDLR  
282 gene and is located at chromosome 19p13.2 (Fig. 2a). Its precise genomic location is  
283 chr19:11,230,768-11,231,198 (GRCh38/hg38) (Fig. 2a). Subsequently, we used  
284 qRT-PCR to amplified the back-spliced junction of circLDLR with divergent  
285 primers, then verified them via Sanger sequencing (Fig. 2a). Furthermore, we  
286 detected circLDLR expression in cDNA and genomic DNA (gDNA) of RKO cells

287 using PCR with divergent primers or convergent primers and an agarose gel  
288 electrophoresis assay. Our consequences suggested that circLDLR was amplified from  
289 cDNA but not from gDNA by using divergent primers (Fig. 2b). A qRT-PCR assay  
290 with oligo (dT)18 primers showed that circLDLR had no poly-A tail (Fig. 2c). To  
291 investigate the stability of circLDLR, total RNA of RKO cells was treated with or  
292 without RNase R. As shown in Fig. 2d, circLDLR could resist digestion by RNase R,  
293 while linear LDLR mRNA (mLDLR) could be degraded by RNase R. Additionally,  
294 circLDLR showed a longer half-life than mLDLR in RKO cells after we added  
295 actinomycin D to them, which serves as an inhibitor of transcription (Fig. 2e).  
296 Subsequently, nuclear and cytoplasmic fractionation followed by qRT-PCR or FISH  
297 indicated that circLDLR was predominately positioned in the cytoplasm (Fig. 2f, g).  
298 In conclusion, circLDLR was substantiated to be a stable circular RNA that was  
299 principally positioned in the cytoplasm.

### 300 **CircLDLR facilitates CRC malignant behaviour and increases cholesterol levels** 301 **in vitro.**

302 Trying to identify the specific function of circLDLR in our study, gain- and  
303 loss-of-function assays were executed. First, five short interfering RNAs (siRNAs)  
304 which were devised to target the back-splice site of circLDLR (si-LDLR-1,  
305 si-LDLR-2, si-LDLR-3, si-LDLR-4 and si-LDLR-5) were synthesized (Fig. 3a). Two  
306 of them (si-LDLR-2 and si-LDLR-4) specifically downregulated the expression of  
307 circLDLR in RKO and HCT116 cells without influencing the LDLR mRNA (mLDLR)  
308 level (Fig. 3a). <sup>71</sup> To explore the influence of circLDLR on CRC cell proliferation,

309 CCK-8 and EdU assays were performed. We found knocking down circLDLR  
310 expression suppressed the rates of proliferation in CRC cells (Fig. 3b, c). The roles of  
311 circLDLR in modulating the CRC cell behaviour of migration and invasion was  
312 further explored via Transwell assays. Our findings confirmed that the migration and  
313 invasion of CRC cells were significantly suppressed after transfection with  
314 si-LDLR-2 and si-LDLR-4 (Fig. 3d). Since LDLR is an key regulator of cholesterol  
315 homeostasis [15], we tried to discover whether circLDLR affects cholesterol  
316 metabolism of CRC cells. We observed that circLDLR knockdown markedly reduced  
317 the total cholesterol (T-CHO) and low-density lipoprotein cholesterol (LDL-C)  
318 expression levels of in CRC cells (Fig. 3e).

319 Furthermore, we ectopically expressed circLDLR to identify its biological function  
320 using a circLDLR-overexpression plasmid. As Fig. 4a shows, the content of  
321 circLDLR was significantly upregulated in SW480 and HT29 cells after transfection  
322 with circLDLR-overexpression plasmids. As expected, overexpression of circLDLR  
323 (circLDLR-OE) significantly facilitated the growth of SW480 and HT29 cells (Fig.  
324 4b-c), which also boosted the migrative and invasive behaviour of these cells (Fig. 4d).  
325 Moreover, circLDLR overexpression led to the elevated contents of T-CHO and  
326 LDL-C in SW480 and HT29 cells (Fig. 4e). Overall, our consequents signified that  
327 circLDLR boosted cell proliferation and metastasis in CRC cells, and increased the  
328 contents of T-CHO and LDL-C.

### 329 **CircLDLR deeds as a miRNA sponge for miR-30a-3p.**

330 Given that circLDLR was predominantly positioned in the cytoplasm, which lacked



331 the ability to encode a protein (analyzed by <sup>1</sup> [circRNADb](http://202.195.183.4:8000/circrnadb/circRNADb.php),  
332 <http://202.195.183.4:8000/circrnadb/circRNADb.php>) (Fig. 2f, g, Supplementary  
333 Fig.S2), we surmised that it might <sup>2</sup> [deed](#) as a miRNA sponge. Therefore, an RIP using  
334 an anti-AGO2 antibody was performed. The findings suggested that circLDLR was  
335 specifically enriched in SW480 and HT29 cells by the AGO2-specific antibody after  
336 transfection with circLDLR-overexpression plasmids (Fig. 5a). Next, three public  
337 databases (miRanda, TargetScan and RNAhybrid) were combined to search for  
338 candidate target miRNAs of circLDLR. With these bioinformatic approaches, 109  
339 candidate miRNAs potentially interacting with circLDLR were identified, as shown in  
340 Fig. 5b and Supplementary Table S4. Among these miRNAs, eleven potential target  
341 miRNAs, which were previously reported to be negatively associated with tumor  
342 progression, were selected for further analysis (Supplementary Table S5). Then, stable  
343 circLDLR-knockdown (sh-circLDLR) RKO and HCT116 cells and stable  
344 circLDLR-overexpressing SW480 and HT-29 cell lines were established  
345 (Supplementary Fig. S3) and <sup>3</sup> [exploited](#) to [disclose](#) the expression of the eleven  
346 potential target miRNAs (Supplementary Fig. S4). As Fig. 5c shows, only the  
347 [expression miR-30a-3p has the negative correlation with the circLDLR level in these](#)  
348 four CRC cell lines, suggesting that circLDLR might interact with miR-30a-3p.  
349 Furthermore, <sup>4</sup> [the data of RNA pull-down assay evidenced](#) [that both circLDLR and](#)  
350 [miR-30a-3p were specifically enriched by the circLDLR probe compared with a](#)  
351 negative control oligo probe in stable circLDLR-overexpressing SW480 and HT29  
352 cells (Fig. 5d). We <sup>5</sup> [further confirmed that miR-30a-3p had a minimal modulatory role](#)

353 in circLDLR production in CRC cells (Fig. 5e). Moreover, FISH analysis indicated  
354 miR-30a-3p colocalized with circLDLR in the CRC cell cytoplasm (Fig. 5f). To  
355 further address whether circLDLR functions by sponging miR-30a-3p, we performed  
356 a series of rescue experiments. An EdU assay indicated that circLDLR  
357 knockdown-induced suppressive effects on cell proliferation were reversed by  
358 treatment with miR-30a-3p inhibitors, while the promotive effects of circLDLR  
359 overexpression was abolished by treatment with miR-30a-3p mimics (Fig. 5g). In  
360 addition, the reduced cell migration and invasion of RKO arised from circLDLR  
361 knockdown was effectively abolished by knockdown of miR-30a-3p (Fig. 5h).  
362 Consistently, miR-30a-3p overexpression reversed the promotive consequences of  
363 circLDLR overexpression on the migrative and invasive behaviour of SW480 cells  
364 (Fig. 5h). Moreover, the introduction of a miR-30a-3p inhibitor abolished the  
365 suppressive influences of circLDLR deletion on the T-CHO and LDL-C expression  
366 (Fig. 5i). The decreased contents of T-CHO and LDL-C induced via circLDLR  
367 overexpression were reversed by treatment with miR-30a-3p mimics (Fig. 6i). Taken  
368 together, these data indicate that circLDLR facilitates CRC tumorigenesis and also  
369 increases the levels of T-CHO and LDL-C by sponging miR-30a-3p.

370 **SOAT1 is a downstream target gene of miR-30a-3p.**

371 CircLDLR is assumed to be derived from the low-density lipoprotein receptor (LDLR)  
372 gene, a key gene associated with cholesterol metabolism. Moreover, previous  
373 researches have indicated that cholesterol metabolism exerts crucial roles in cancer  
374 progression and metastasis [16, 17]. More importantly, we found that circLDLR not

375 only facilitates tumorigenesis in CRC, but also increases the levels of T-CHO and  
376 LDL-C by sponging <sup>14</sup> miR-30a-3p. Hence, we inferred that the circLDLR/miR-30a-3p  
377 axis might regulate cholesterol metabolism-related genes. According to <sup>6</sup> TargetScan  
378 ([http://www.targetscan.org/vert\\_72/](http://www.targetscan.org/vert_72/)), we screened out two key cholesterol  
379 metabolism-associated genes (SOAT1 and HMGCR) as the predicted downstream  
380 <sup>89</sup> regulatory genes of miR-30a-3p. <sup>3</sup> qRT-PCR results indicated that miR-30a-3p mimics  
381 could obviously decrease the expression of SOAT1, while miR-30a-3p inhibitors  
382 markedly increased the level of SOAT1 in both RKO cells and SW480 cells (Fig. 6a).  
383 <sup>10</sup> However, the expression of miR-30a-3p had a smaller influence on the expression of  
384 HMGCR (Supplementary Fig. S5a, b). The models of hybridization between the  
385 <sup>3</sup> SOAT1 3'UTR and miR-30a-3p are <sup>42</sup> illustrated in Fig. S5c. A luciferase reporter assay  
386 showed that miR-30a-3p overexpression decreased the activity of the luciferase  
387 reporter containing the wild-type SOAT1 3'UTR (Fig. 6b). <sup>3</sup> Moreover, overexpression  
388 of miR-30a-3p markedly decreased the SOAT1 protein level of RKO cells, and  
389 <sup>34</sup> downregulation of miR-30a-3p produced the opposite results in SW480 cells (Fig. 6c).  
390 <sup>3</sup> These results propound that SOAT1 is a direct target gene of miR-30-3p. Next, we  
391 explored whether circLDLR exerts a regulatory effect on SOAT1 expression via  
392 <sup>3</sup> miR-30a-3p. Western blot data indicated that silencing of circLDLR obviously  
393 reduced SOAT1 expression in RKO and HCT116 cells, while overexpression of  
394 circLDLR increased that in SW480 and HT29 cells (Fig. 6d). Furthermore, the  
395 reduced SOAT1 expression caused by circLDLR knockdown was significantly  
396 <sup>3</sup> inverted by treatment with miR-30a-3p inhibitors in RKO cells (Fig. 6e). Moreover,

397 <sup>3</sup> overexpression of miR-30a-3p abolished the promotion of SOAT1 protein expression  
398 by circLDLR overexpression in SW480 cells (Fig. 6e). Collectively, these data  
399 propose that SOAT1 is a <sup>22</sup> downstream target of circLDLR/miR-30a-3p.

400 **The circLDLR/miR-30a-3p/SOAT1 axis modulates malignant behaviour and**  
401 **increases cholesterol levels in CRC.**

402 To further explore the biological role of SOAT1, we examined whether SOAT1  
403 participates in circLDLR-mediated CRC progression. EdU and Transwell assays were  
404 performed and revealed that knocking down SOAT1 inhibited cell growth, <sup>33</sup> migration  
405 and invasion, which were enhanced in HT29 cells and SW480 cells <sup>10</sup> after treatment  
406 with a miR-30a-3p inhibitor (Fig. 6f, g, Supplementary Fig. S6a, b). Moreover,  
407 SOAT1 downregulation significantly <sup>76</sup> reversed the promotive effect of miR-30a-3p  
408 inhibitors on T-CHO and LDL-C contents in CRC cells (Fig. 6h). Consistently,  
409 knockdown of SOAT1 inverted the enhancement of proliferation, migration and  
410 invasion induced by circLDLR overexpression (Fig. 6i, j, Supplementary Fig. S6c, d),  
411 and reversed the promotive consequence of circLDLR overexpression on T-CHO and  
412 LDL-C contents in CRC cells (Fig. 6k). Our findings indicated that SOAT1  
413 suppression could obviously restrain circLDLR-mediated tumorigenesis and the  
414 increase of cholesterol levels.

415 **CircLDLR <sup>1</sup> benefits tumor growth and metastasis of CRC in vivo**

416 Our team further explored whether circLDLR contributes to CRC expansion in vivo,  
417 so we constructed xenograft mouse models. Stable circLDLR-knockdown HCT116  
418 cells (sh-circLDLR) or stable circLDLR-overexpressing HT29 cells (circLDLR-OE)

419 were <sup>2</sup> infused into the subcutaneous of right hind flank of nude mice. The results  
420 showed that circLDLR knockdown inhibited, while circLDLR overexpression  
421 promoted, tumor growth in vivo, as evidenced by tumor imaging and results for tumor  
422 volume and tumor weight (Fig. 7a-f). IHC staining showed that Ki-67, CD31 and  
423 SOAT1 levels were significantly positively correlative with circLDLR contents in  
424 xenograft tumor tissues (Supplementary Fig. S7). Conducting a tail vein injection  
425 model, we then analyzed the action of circLDLR on CRC metastasis in vivo. The  
426 findings pointed that circLDLR knockdown suppressed the metastasis of CRC cells to  
427 the lungs (Fig. 7g-i). CircLDLR overexpression had the opposite effect (Fig. 7j-l).  
428 Our findings suggest that circLDLR enhances CRC tumor expansion and metastasis  
429 in vivo.

### 430 Discussion

431 Currently, numerous circular RNAs have been identified and are considered tumor  
432 regulators in multiple cancers, including CRC [8]. <sup>1</sup> For example, it has been reported  
433 that circPPP1R12A enhances the proliferation ability, as well as migration and  
434 <sup>79</sup> invasive behaviours of colon cancer via Hippo-YAP signaling [18]. Silencing  
435 circDENND4C could block the miR-760/GLUT1 axis, which obviously suppresses  
436 cell expansion and migration, and glycolysis as well in CRC [19]. In our study,  
437 circRNA profiling of CRC tissues was performed by <sup>1</sup> RNA-seq analysis of ribosomal  
438 RNA-depleted total RNA. Among the differential circRNAs, we focused on the  
439 upregulated circRNA circLDLR, which was positively related to the OS and TNM  
440 stage of CRC patients. <sup>85</sup> Importantly, loss- and gain-of-function experiments signified

441 that circLDLR facilitated the abilities of proliferation, migration, and invasion in CRC  
442 cells in vitro and accelerated CRC tumorigenesis and metastasis in vivo. These results  
443 revealed that circLDLR is a novel oncogenic circRNA in CRC.

444 In this study, we further probed into the roles of circLDLR, which is derived from the  
445 LDLR gene, a key gene associated with cholesterol homeostasis. Cholesterol is an  
446 indispensable lipid component of various cell types and exerts critical effects on cell  
447 signaling. The cholesterol accumulation is a well-known feature of tumors, and  
448 picking out cholesterol metabolism has been explored as a novel therapeutic scheme  
449 for cancer treatment [20]. There are literatures that LDLR is the patriarch of the  
450 LDLR family, orchestrating cholesterol homeostasis [15]. Interestingly, exosomal  
451 circLDLR has been revealed to be associated with the production of estradiol in  
452 polycystic ovary syndrome [21]. We found that circLDLR increased the contents of  
453 T-CHO and LDL-C in CRC cells. However, we only detected the contents of T-CHO  
454 and LDL-C while did not elaborate on the mechanism of circLDLR in cholesterol  
455 metabolism in several parts of our study. We focused on the change of cholesterol  
456 levels in CRC cells and tried to provide an insight into the possibility of circLDLR in  
457 cholesterol metabolism. Collectively, our outcomes imply that circLDLR exerts a  
458 significant role in modulating cholesterol levels, which may be a key regulator of  
459 cholesterol metabolism in CRC.

460 CircRNAs have been demonstrated to play critical effects on CRC via various  
461 mechanisms, such as miRNA sponges [22]. As a sponge for miR-200c-3p, knockdown  
462 of Hsa\_circ\_001783 markedly inhibits the ability of proliferation and the behavior

463 invasion in breast cancer cells [23]. Circ-RanGAP1 sponges miR-877-3p to raise  
464 VEGFA production and boosts gastric cancer invasion and metastasis [24]. Herein,  
465 circLDLR was confirmed to be predominantly positioned in the cytoplasm of CRC  
466 cells, representing that circLDLR might deed as a miRNA sponge. Our results showed  
467 that among all the potential miRNAs bound by circLDLR, miR-30a-3p, which is  
468 downregulated in CRC tissues[25], interacted with circLDLR in CRC cells. Moreover,  
469 we demonstrated that circLDLR exerted its <sup>1</sup>function as a ceRNA (competing  
470 endogenous RNA) through competitive binding to miR-30a-3p. It has been reported  
471 that circRNAs mediate their functions via other mechanisms, such as translation to  
472 produce functional peptides and interaction with RNA-binding proteins [22]. We used  
473 a detailed database named circRNADb, which contains human circRNAs with  
474 protein-coding annotations [26], to investigate whether circLDLR can be translated  
475 into a functional protein. Our results indicated circLDLR lacking a protein-coding  
476 sequence (Supplementary Fig. S2). However, we could not exclude the possibility that  
477 circLDLR exerts its function via other mechanisms.

<sup>57</sup>SOAT1, also known as cholesterol acyltransferase 1 (ACAT1), is a key player in  
478 cellular cholesterol homeostasis [20]. It has been informed that <sup>48</sup>SOAT1 is widely  
479 expressed in different types of cells, highly expressed in various tumors as well [27].  
480 More importantly, nevanimibe HCl, a novel SOAT1 inhibitor, was used in a phase I  
481 study of adrenocortical carcinoma [28]. In the current study, our findings showed that  
482 the direct target <sup>14</sup>gene of miR-30a-3p is SOAT1. CircLDLR could control SOAT1  
483 production by restraining miR-30a-3p. Moreover, SOAT1 suppression could

485 significantly inhibit circLDLR-mediated tumorigenesis and the <sup>5</sup> elevated contents of  
486 T-CHO and LDL-C in CRC cells. Therefore, the circLDLR/miR-30a-3p axis  
487 modulates CRC tumorigenesis and cholesterol levels via SOAT1.  
488 In conclusion, we first demonstrated the clinical significance of circLDLR and  
489 revealed that circLDLR promoted CRC cell tumorigenesis and increased cholesterol  
490 levels via miR-30a-3p/SOAT1 signaling (Fig. 8). Based on our consequences, we trust  
491 that circLDLR may serve as a encouraging curative gene and prognostic predictor in  
492 CRC.

#### 493 **Abbreviations**

494 CRC: Colorectal cancer; SOAT1: Sterol O-acyltransferase 1; CircRNAs: Circular  
495 RNAs; <sup>68</sup> RIP: RNA immunoprecipitation; FISH: Fluorescence in situ hybridization;  
496 LDLR: Low-density lipoprotein receptor; OS: Overall survival; mLDLR: LDLR  
497 mRNA; CeRNA: Competing endogenous RNA.

#### 498 **<sup>1</sup> Ethics approval and consent to participate**

499 This study was approved by the First Affiliated Hospital of Soochow University  
500 (Suzhou, China; 2020084).

#### 501 **Consent for publication**

502 Not applicable.

#### 503 **Competing interests**

504 The authors declare that they have no competing interests.

#### 505 **<sup>21</sup> Availability of data and materials**

506 For all data requests, please contact the corresponding author.



507 **Funding**

508 <sup>16</sup> This work was supported by the National Natural Science Foundation of China  
509 (82073156); Key Social Development Project of Jiangsu Province (BE2020656); The  
510 Natural Science Foundation of the Jiangsu Higher Education Institutions of China  
511 (20KJA310005); Suzhou Science & Technology Plan Project (SKJYD2021082);  
512 <sup>51</sup> Project of Medical Research of Jiangsu Commission of Health (ZDA2020008);  
513 Suzhou Wujiang District Revitalizing Health through Science & Education Project  
514 (WWK202011).

515 **Acknowledgements**

516 <sup>49</sup> Not applicable.

517 **Authors' contributions**

518 The authors checked and approved the final manuscript. XGZ, GBZ and TGS  
519 designed all experiments, YJC and YQC collected clinical samples, RQW and JYW  
520 performed all experiments. QHX and LQS performed the data analysis. <sup>13</sup> The  
521 manuscript was wrote by RQW and revised by XLD, TGS and WCC.

522 **References**

- 523 1. Bray F, Ferlay J, Soerjomataram I, Siegel R, Torre L, and Jemal A. Global  
524 cancer statistics 2018: GLOBOCAN estimates of incidence and mortality  
525 worldwide for 36 cancers in 185 countries. CA: a cancer journal for clinicians  
526 2018; 68:394-424.
- 527 2. Dienstmann R, Vermeulen L, Guinney J, Kopetz S, Tejpar S, and Tabernero J.  
528 Consensus molecular subtypes and the evolution of precision medicine in

- 529 colorectal cancer. *Nature reviews. Cancer* 2017; 17:79-92.
- 530 3. Watson A and Collins P. Colon cancer: a civilization disorder. *Digestive*  
531 *diseases* (Basel, Switzerland) 2011; 29:222-8.
- 532 4. Siegel R, Miller K, and Jemal A. Cancer statistics, 2016. *CA: a cancer journal*  
533 *for clinicians* 2016; 66:7-30.
- 534 5. Goldstein D, Zeichner S, Bartnik C, Neustadter E, and Flowers C. Metastatic  
535 Colorectal Cancer: A Systematic Review of the Value of Current Therapies.  
536 *Clinical colorectal cancer* 2016; 15:1-6.
- 537 6. Chen L. The biogenesis and emerging roles of circular RNAs. *Nature reviews.*  
538 *Molecular cell biology* 2016; 17:205-11.
- 539 7. Zhang Z, Yang T, and Xiao J. Circular RNAs: Promising Biomarkers for  
540 Human Diseases. *EBioMedicine* 2018; 34:267-274.
- 541 8. Beilerli A, Gareev I, Beylerli O, Yang G, Pavlov V, Aliev G, et al. Circular  
542 RNAs as biomarkers and therapeutic targets in cancer. *Seminars in cancer*  
543 *biology* 2021.
- 544 9. Chen L, Wang L, Ren Y, Pang Z, Liu Y, Sun X, et al. The circular RNA  
545 circ-ERBIN promotes growth and metastasis of colorectal cancer by  
546 miR-125a-5p and miR-138-5p/4EBP-1 mediated cap-independent HIF-1 $\alpha$   
547 translation. *Molecular cancer* 2020; 19:164.
- 548 10. Zeng K, Chen X, Xu M, Liu X, Hu X, Xu T, et al. CircHIPK3 promotes  
549 colorectal cancer growth and metastasis by sponging miR-7. *Cell death &*  
550 *disease* 2018; 9:417.

- 551 11. Peng L, Sang H, Wei S, Li Y, Jin D, Zhu X, et al. circCUL2 regulates gastric  
552 cancer malignant transformation and cisplatin resistance by modulating  
553 autophagy activation via miR-142-3p/ROCK2. *Molecular cancer* 2020;  
554 19:156.
- 555 12. Zhu X, Du J, and Gu Z. Circ-PVT1/miR-106a-5p/HK2 axis regulates cell  
556 growth, metastasis and glycolytic metabolism of oral squamous cell carcinoma.  
557 *Molecular and cellular biochemistry* 2020; 474:147-158.
- 558 13. Wang R, Ma Y, Zhan S, Zhang G, Cao L, Zhang X, et al. B7-H3 promotes  
559 colorectal cancer angiogenesis through activating the NF- $\kappa$ B pathway to  
560 induce VEGFA expression. *Cell death & disease* 2020; 11:55.
- 561 14. Shi T, Ma Y, Cao L, Zhan S, Xu Y, Fu F, et al. B7-H3 promotes aerobic  
562 glycolysis and chemoresistance in colorectal cancer cells by regulating HK2.  
563 *Cell death & disease* 2019; 10:308.
- 564 15. Go G and Mani A. Low-density lipoprotein receptor (LDLR) family  
565 orchestrates cholesterol homeostasis. *The Yale journal of biology and*  
566 *medicine* 2012; 85:19-28.
- 567 16. Zhao Z, Hao D, Wang L, Li J, Meng Y, Li P, et al. CtBP promotes metastasis  
568 of breast cancer through repressing cholesterol and activating TGF- $\beta$  signaling.  
569 *Oncogene* 2019; 38:2076-2091.
- 570 17. Wang C, Li P, Xuan J, Zhu C, Liu J, Shan L, et al. Cholesterol Enhances  
571 Colorectal Cancer Progression via ROS Elevation and MAPK Signaling  
572 Pathway Activation. *Cellular physiology and biochemistry : international*

- 573 journal of experimental cellular physiology, biochemistry, and pharmacology  
574 2017; 42:729-742.
- 575 18. Zheng X, Chen L, Zhou Y, Wang Q, Zheng Z, Xu B, et al. A novel protein  
576 encoded by a circular RNA circPPP1R12A promotes tumor pathogenesis and  
577 metastasis of colon cancer via Hippo-YAP signaling. *Molecular cancer* 2019;  
578 18:47.
- 579 19. Zhang Z, Zhang Y, Qin X, Wang Y, and Fu J. Circular RNA circDENND4C  
580 facilitates proliferation, migration and glycolysis of colorectal cancer cells  
581 through miR-760/GLUT1 axis. *European review for medical and  
582 pharmacological sciences* 2020; 24:2387-2400.
- 583 20. Xu H, Zhou S, Tang Q, Xia H, and Bi F. Cholesterol metabolism: New  
584 functions and therapeutic approaches in cancer. *Biochimica et biophysica acta.  
585 Reviews on cancer* 2020; 1874:188394.
- 586 21. Huang X, Wu B, Chen M, Hong L, Kong P, Wei Z, et al. Depletion of  
587 exosomal circLDLR in follicle fluid derepresses miR-1294 function and  
588 inhibits estradiol production via CYP19A1 in polycystic ovary syndrome.  
589 *Aging* 2020; 12:15414-15435.
- 590 22. Long F, Lin Z, Li L, Ma M, Lu Z, Jing L, et al. Comprehensive landscape and  
591 future perspectives of circular RNAs in colorectal cancer. *Molecular cancer*  
592 2021; 20:26.
- 593 23. Liu Z, Zhou Y, Liang G, Ling Y, Tan W, Tan L, et al. Circular RNA  
594 hsa\_circ\_001783 regulates breast cancer progression via sponging

- 595 miR-200c-3p. *Cell death & disease* 2019; 10:55.
- 596 24. Lu J, Wang Y, Yoon C, Huang X, Xu Y, Xie J, et al. Circular RNA  
597 circ-RanGAP1 regulates VEGFA expression by targeting miR-877-3p to  
598 facilitate gastric cancer invasion and metastasis. *Cancer letters* 2020;  
599 471:38-48.
- 600 25. Ma Y, Zhang P, Yang J, Liu Z, Yang Z, and Qin H. Candidate microRNA  
601 biomarkers in human colorectal cancer: systematic review profiling studies  
602 and experimental validation. *International journal of cancer* 2012;  
603 130:2077-87.
- 604 26. Chen X, Han P, Zhou T, Guo X, Song X, and Li Y. circRNADb: A  
605 comprehensive database for human circular RNAs with protein-coding  
606 annotations. *Scientific reports* 2016; 6:34985.
- 607 27. Wang Y, Bian Y, Luo J, Lu M, Xiong Y, Guo S, et al. Cholesterol and fatty  
608 acids regulate cysteine ubiquitylation of ACAT2 through competitive  
609 oxidation. *Nature cell biology* 2017; 19:808-819.
- 610 28. Smith D, Kroiss M, Kebebew E, Habra M, Chugh R, Schneider B, et al. A  
611 phase 1 study of nevanimibe HCl, a novel adrenal-specific sterol  
612 O-acyltransferase 1 (SOAT1) inhibitor, in adrenocortical carcinoma.  
613 *Investigational new drugs* 2020; 38:1421-1429.
- 614
- 615
- 616

617 **Figure legends**

618 **Fig. 1** CircLDLR is elevated in CRC tissues and positively related with a poor  
619 prognosis in patients with CRC. **a** The length distribution of exonic circRNAs. **b, c**  
620 Schematic illustration of the differentially expressed circRNAs in CRC tissues. **d** The  
621 fold change in circLDLR expression between CRC tissues and normal adjacent  
622 tissues was analyzed by qRT-PCR. **e** Relative expression of circLDLR in CRC cell  
623 lines compared to that in the NCM-460 cell line. **f** Kaplan-Meier analysis of the  
624 overall survival of CRC patients stratified into high and low circLDLR expression  
625 groups. \*P < 0.05; \*\*\*P < 0.001; NS, no significance.

626 **Fig. 2** circLDLR characterization in colorectal cancer. **a** Schematic diagram of  
627 circLDLR shows that it is generated by the circclization of LDLR exons 13 and 14.  
628 CircLDLR was scouted by qRT-PCR, which sequence was confirmed via Sanger  
629 sequencing. Red arrows used to indicate the special splicing junction of circLDLR. **b**  
630 CircLDLR expression in RKO cells detected by qRT-PCR followed by agarose gel  
631 electrophoresis showing that divergent primers amplified circLDLR in cDNA but not  
632 genomic DNA (gDNA). GAPDH served as a negative control. **c** After reverse  
633 transcription using random hexamer or oligo (dT)18 primers, the relative expression  
634 of circLDLR and mLDLR was analyzed by qRT-PCR. **d** Relative RNA contents were  
635 detected by qRT-PCR, then normalized to the value analyzed in the mock group. **E**  
636 Relative expression of circLDLR and mLDLR was detected by qRT-PCR after we  
637 treated them using actinomycin D at the several time points. **f** The abundance of  
638 circLDLR and mLDLR in cytoplasmic and nuclear parts of RKO cells was evaluated

639 by qRT-PCR. We applied U6 and GAPDH<sup>50</sup> as positive controls for the cytoplasmic  
640 and nuclear fractions, respectively. **g** The localization of circLDLR in RKO<sup>1</sup> cells was  
641 scouted by FISH. Nuclei were stained with DAPI (blue), and circLDLR probes were  
642 labeled with Cy3 (red). Scale bar, 20  $\mu$ m. CircLDLR, the<sup>11</sup> circular RNA derived from  
643 exons 13 and 14 of the LDLR gene;<sup>4</sup> Data are presented as the mean $\pm$ SD of three  
644 independent experiments. \*\*P < 0.01; \*\*\*P < 0.001.

645 **Fig. 3 CircLDLR suppression inhibits CRC malignant behaviour and increases**

646 **cholesterol levels in vitro. a** The circLDLR and mLDLR expression was assessed in  
647 RKO and HCT116 cells transfected with five independent siRNAs targeting  
648 circLDLR by qRT-PCR. **b** Cell proliferation was scouted<sup>1</sup> at the indicated time points  
649 by CCK-8 assays evaluating HCT116 cells and RKO cells stimulated with si-NC or  
650 si-circLDLR. **c** EdU analysis of the proliferative ability of<sup>87</sup> HCT116 cells and RKO  
651 cells treated with si-NC or si-circLDLR.<sup>1</sup> Representative images are shown. Scale bar,  
652 200  $\mu$ m. Statistical analysis of the EdU-positive cell percentage in transfected GC  
653 cells<sup>2</sup> is shown in the bar graph. **d** The cell migration and invasion of CRC cells were  
654 examined by Transwell assays after cells were transfected with si-circLDLR or si-NC.  
655 Representative images are shown. Scale bar, 200  $\mu$ m. Statistical analysis of the  
656 migrated and invaded cell numbers is shown in the bar graph. **e** The production of  
657 T-CHO and LDL-C was assessed in CRC cells transfected with<sup>8</sup> si-NC or si-circLDLR.  
658 Data are presented as the mean $\pm$ SD of three independent experiments. \*P < 0.05; \*\*P  
659 < 0.01; \*\*\*P < 0.001.

660 **Fig. 4 CircLDLR overexpression facilitates CRC malignant behaviour and**

661 **increases cholesterol levels in vitro.** **a** The expression of circLDLR in RKO and  
662 HCT116 <sup>1</sup> cells transfected with a circLDLR-overexpression vector (circLDLR-OE) or  
663 the control vector (Vector) was assessed by qRT-PCR. **b** <sup>1</sup> Cell proliferation was  
664 **scouted** at the indicated time points by CCK-8 assays evaluating RKO cells and  
665 HCT116 cells transfected with circLDLR-OE or Vector. **c** EdU analysis of the  
666 proliferative ability of RKO cells and HCT116 cells transfected with circLDLR-OE or  
667 Vector. <sup>1</sup> Representative images are shown. Scale bar, 200  $\mu$ m. Statistical analysis of the  
668 **EdU-positive cell percentage in transfected CRC cells** <sup>2</sup> is shown in the bar graph. **d**  
669 The **cell migration and invasion** of CRC cells were examined by Transwell assays  
670 after cells were transfected with circLDLR-OE or Vector. <sup>1</sup> Representative images are  
671 shown. Scale bar, 200  $\mu$ m. Statistical analysis of the migrated and invaded cell  
672 numbers is shown in the bar graph. **e** The **production** <sup>70</sup> of T-CHO and LDL-C in CRC  
673 cells transfected with circLDLR-OE or Vector were **appraised**. <sup>4</sup> Data are presented as  
674 the mean $\pm$ SD of three independent experiments. \*P < 0.05; \*\*P < 0.01; \*\*\*P < 0.001.

675 **Fig. 5 CircLDLR acts as a miRNA sponge for miR-30a-3p.** **a** RIP assays were  
676 carried out using an AGO2-specific antibody and SW480 or HT29 cells, and the  
677 **richness** of circLDLR was **scouted** <sup>23</sup> by qRT-PCR. **b** Schematic illustration showing the  
678 109 overlapping miRNAs with potential binding to circLDLR predicted by **miRanda,**  
679 **RNAhybrid and TargetScan.** **c** Schematic illustration showing that miR-30a-3p was  
680 verified to be one of the 11 predicted miRNAs associated with tumor progression  
681 among the 109 overlapping miRNAs in different CRC cell lines. **d** Lysates prepared  
682 from circLDLR-OE SW480 and HT29 cells <sup>20</sup> were incubated with biotinylated probes



683 against circLDLR, and then an RNA pull-down assay was performed. qRT-PCR was  
684 carried out to prove the contents of circLDLR and miR-30a-3p. e The production of  
685 circLDLR in different CRC cell lines<sup>15</sup> transfected with miR-30a-3p mimics or mimic  
686 NC were evaluated by qRT-PCR. f The circLDLR and miR-30a-3p colocalization in  
687 RKO<sup>1</sup> cells was detected by RNA FISH. Nuclei were stained with DAPI (blue).  
688 CircLDLR probes were labeled with Cy3 (red), and miR-30a-3p probes were labeled  
689 with FAM (green). Scale bar, 20  $\mu$ m. g EdU analysis of the proliferative ability of  
690 RKO cells<sup>7</sup> transfected with sh-circLDLR or cotransfected with sh-circLDLR and  
691 miR-30a-3p inhibitors. EdU analysis of the proliferative ability of SW480 cells  
692 treated with circLDLR-OE or<sup>3</sup> co-transfected with circLDLR-OE and miR-30a-3p  
693 mimics.<sup>1</sup> Representative images are shown. Scale bar, 200  $\mu$ m. Statistical analysis of  
694 the EdU-positive cell percentage in transfected RKO and SW480 cells is displayed in  
695 the bar graph.<sup>27</sup> h The cell migration and invasion of RKO cells transfected with  
696 sh-circLDLR or cotransfected with sh-circLDLR and miR-30a-3p inhibitors were  
697 examined. The cell migration and invasion of SW480 cells transfected with  
698 circLDLR-OE or<sup>15</sup> co-stimulated with circLDLR-OE and miR-30a-3p mimics were  
699 examined.<sup>1</sup> Representative images are shown. Scale bar, 200  $\mu$ m. Statistical analysis of  
700 the migrated and invaded cell numbers is shown in the bar graph. i The T-CHO and  
701 LDL-C contents in RKO cells<sup>7</sup> transfected with sh-circLDLR or cotransfected with  
702 sh-circLDLR and miR-30a-3p inhibitors were assessed. The T-CHO and LDL-C  
703 contents in SW480 cells treated with circLDLR-OE<sup>7</sup> or cotransfected with  
704 circLDLR-OE and miR-30a-3p mimics were assessed.<sup>4</sup> Data are presented as the

705 mean±SD of three independent experiments. \*\*P < 0.01; \*\*\*P < 0.001; NS, no  
706 significance.

707 **Fig. 6 SOAT1 is a downstream target of miR-30a-3p.** <sup>62</sup> **a** RKO and SW480 <sup>59</sup> cells  
708 were transfected with miR-30a-3p mimics or inhibitors. SOAT1 expression was  
709 <sup>65</sup> **scouted** by qRT-PCR. **b** Relative activities of luciferase were measured in HEK293T  
710 cells after transfection with SOAT1-Mut or SOAT1-WT <sup>3</sup> and miR-30a-3p mimics or  
711 mimic NC. <sup>3</sup> **c** Overexpression of miR-30a-3p restrained the protein production of  
712 SOAT1. <sup>3</sup> **Suppression** of miR-30a-3p raised the expression of SOAT1 protein. **d**  
713 Knockdown of circLDLR (sh-circLDLR) inhibited the protein expression of SOAT1.  
714 Overexpression of circLDLR (circLDLR-OE) increased the protein expression of  
715 SOAT1. **e** Knockdown of miR-30a-3p reversed the sh-circLDLR-induced  
716 <sup>3</sup> downregulation of SOAT1 expression in RKO cells. Overexpression of miR-30a-3p  
717 reversed the circLDLR-OE-induced upregulation of SOAT1 expression in SW480  
718 cells. GAPDH <sup>1</sup> **deeded** as a loading control. **f** <sup>1</sup> **EdU analysis of the cell proliferation**  
719 **ability in SW480 and HT29 transfected with miR-30a-3p inhibitors or cotransfected**  
720 <sup>58</sup> **with si-SOAT1 and miR-30a-3p inhibitors.** **g** <sup>58</sup> **Cell migration and invasion in SW480**  
721 **and HT29 transfected with miR-30a-3p inhibitors or cotransfected with si-SOAT1 and**  
722 **miR-30a-3p inhibitors were examined.** <sup>5</sup> **h** <sup>5</sup> **The contents of T-CHO and LDL-C in**  
723 **SW480 and HT29** <sup>3</sup> **cells transfected with miR-30a-3p inhibitors or cotransfected with**  
724 **si-SOAT1 and miR-30a-3p inhibitors were assessed.** <sup>1</sup> **i** <sup>1</sup> **EdU analysis of the cell**  
725 **proliferation ability in SW480 and HT29 transfected with circLDLR-OE or**  
726 **cotransfected with si-SOAT1 and circLDLR-OE.** <sup>60</sup> **j** <sup>60</sup> **Cell behaviors of migration and**

727 invasion in HT29 and SW480 cells transfected with circLDLR-OE or cotransfected  
728 with si-SOAT1 and circLDLR-OE were examined. **k** The contents of T-CHO and  
729 LDL-C in SW480 and HT29 cells transfected with circLDLR-OE or cotransfected  
730 with si-SOAT1 and circLDLR-OE were assessed. Data are presented as the mean±SD  
731 of three independent experiments. \*P < 0.05; \*\*P < 0.01; \*\*\*P < 0.001; NS, no  
732 significance.

733 **Fig. 7** CircLDLR knockdown restrains CRC tumor growth and metastasis in  
734 vivo. **a** Representative images of subcutaneous xenograft tumors from sh-circLDLR  
735 group and the sh-NC group (n=5). **b, c** In comparison with the sh-NC group, the  
736 sh-circLDLR group had tumors with observably decreased volume (**b**) and weight (**c**).  
737 **d** Representative images of subcutaneous xenograft tumors from the circLDLR-OE  
738 group and the Vector group (n=5). **e, f** In comparison with the Vector group, the  
739 circLDLR-OE group had tumors with observably increased volume (**e**) and weight (**f**).  
740 **g** Representative images of mouse lungs six weeks after transplantation. **h, i** Images  
741 of HE staining are shown (**h**), and the tumor area was measured (**i**). **j** Representative  
742 images of mouse lungs six weeks after transplantation. **k, l** Images of HE staining are  
743 shown (**k**), and the tumor area was measured (**l**). Data are presented as the mean±SD  
744 of three independent experiments. \*P < 0.05; \*\*P < 0.01; \*\*\*P < 0.001.

745 **Fig. 8** Schematic diagram showing the regulatory mechanisms of the  
746 circLDLR/miR-30a-3p/SOAT1 axis in CRC.

## 6.7-Wang

---

原创性报告

---

29%

相似指数

23%

网际网络来源

26%

出版物

3%

学生文稿

---

主要来源

---

1

[molecular-cancer.biomedcentral.com](http://molecular-cancer.biomedcentral.com)

网际网络来源

6%

---

2

[www.nature.com](http://www.nature.com)

网际网络来源

3%

---

3

[www.ncbi.nlm.nih.gov](http://www.ncbi.nlm.nih.gov)

网际网络来源

2%

---

4

[pubmed.ncbi.nlm.nih.gov](http://pubmed.ncbi.nlm.nih.gov)

网际网络来源

1%

---

5

Youxia Wang, Xiaoling Chen, Zhiqing Huang, Daiwen Chen, Bing Yu, Jie Yu, Hong Chen, Jun He, Yuheng Luo, Ping Zheng. "Dietary Ferulic Acid Supplementation Improves Antioxidant Capacity and Lipid Metabolism in Weaned Piglets", *Nutrients*, 2020

出版物

1%

---

6

[www.frontiersin.org](http://www.frontiersin.org)

网际网络来源

1%

---

7

Yizheng Wu, Ziang Xie, Junxin Chen, Jiabin Chen et al. "Circular RNA circTADA2A promotes osteosarcoma progression and

1%

metastasis by sponging miR-203a-3p and regulating CREB3 expression", Molecular Cancer, 2019

出版物

8

test.dovepress.com

网际网络来源

1 %

9

www.jcancer.org

网际网络来源

<1 %

10

Chengdong Liu, Xiaohan Zhou, Qian Long, Hanyi Zeng, Qingcan Sun, Yuting Chen, Dehua Wu, Li Liu. "Small extracellular vesicles containing miR-30a-3p attenuate the migration and invasion of hepatocellular carcinoma by targeting SNAP23 gene", Oncogene, 2020

出版物

<1 %

11

Jian Yu, Qing-guo Xu, Zhen-guang Wang, Yuan Yang, Ling Zhang, Jin-zhao Ma, Shu-han Sun, Fu Yang, Wei-ping Zhou. "Circular RNA cSMARCA5 inhibits growth and metastasis in hepatocellular carcinoma", Journal of Hepatology, 2018

出版物

<1 %

12

Xiaomi Li, Huimin Lu, Yanzheng Gu, Xueguang Zhang, Guangbo Zhang, Tongguo Shi, Weichang Chen. "Tim-3 suppresses the killing effect of Vy9Vδ2 T cells on colon cancer cells by reducing perforin and granzyme B

<1 %

13

[assets.researchsquare.com](https://assets.researchsquare.com)

网际网络来源

<1 %

14

Qi Xu, Demin Cheng, Guanru Li, Yi Liu, Ping Li, Wenqing Sun, Dongyu Ma, Chunhui Ni.

"CircHIPK3 regulates pulmonary fibrosis by facilitating glycolysis in miR-30a-3p/FOXK2-dependent manner", International Journal of Biological Sciences, 2021

出版物

<1 %

15

[breast-cancer-research.biomedcentral.com](https://breast-cancer-research.biomedcentral.com)

网际网络来源

<1 %

16

[onlinelibrary.wiley.com](https://onlinelibrary.wiley.com)

网际网络来源

<1 %

17

"17th International Congress of Immunology, 19–23 October 2019, Beijing, China", European Journal of Immunology, 2019

出版物

<1 %

18

Jingbing Lou, Hongliang Zhang, Jiuwei Xu, Tingting Ren, Yi Huang, Xiaodong Tang, Wei Guo. "circUSP34 accelerates osteosarcoma malignant progression by sponging miR-16-5p", Cancer Science, 2021

出版物

<1 %

19

Ruoqin Wang, Linqing Sun, Suhua Xia, Hongya Wu et al. "B7-H3 suppresses doxorubicin-

<1 %

induced senescence-like growth arrest in colorectal cancer through the AKT/TM4SF1/SIRT1 pathway", Cell Death & Disease, 2021

出版物

20

Xin Huang, Jingyu Wang, Jibin Guan, Zhong Zheng, JunFeng Hao, Zitong Sheng, Menghua Wang, Tianhua Xu, Guangying Guo, Li Yao. "Exosomal Circsafb2 Reshaping Tumor Environment to Promote Renal Cell Carcinoma Progression by Mediating M2 Macrophage Polarization", Frontiers in Oncology, 2022

出版物

<1 %

21

[link.springer.com](https://link.springer.com)

网际网络来源

<1 %

22

Xiaobo Li, Binliang Wang, Mao Huang, Xiaomi Wang. "miR-30a-3p participates in the development of asthma by targeting CCR3", Open Medicine, 2020

出版物

<1 %

23

Taoyue Yang, Peng Shen, Qun Chen, Pengfei Wu et al. "FUS-induced circRHOBTB3 facilitates cell proliferation via miR-600/NACC1 mediated autophagy response in pancreatic ductal adenocarcinoma", Journal of Experimental & Clinical Cancer Research, 2021

出版物

<1 %

24 Yang Ji, Shikun Yang, Xueqi Yan, Li Zhu et al. "CircCRIM1 Promotes Hepatocellular Carcinoma Proliferation and Angiogenesis by Sponging miR-378a-3p and Regulating SKP2 Expression", *Frontiers in Cell and Developmental Biology*, 2021  
出版物 <1 %

---

25 [www.dovepress.com](http://www.dovepress.com)  
网际网络来源 <1 %

---

26 [bio-bigdata.hrbmu.edu.cn](http://bio-bigdata.hrbmu.edu.cn)  
网际网络来源 <1 %

---

27 [www.dovepress.com](http://www.dovepress.com)  
网际网络来源 <1 %

---

28 Rongrong Huang, Yuan Zhang, Bing Han, Ying Bai, Rongbin Zhou, Guangming Gan, Jie Chao, Gang Hu, Honghong Yao. " Circular RNA regulates astrocyte activation via cooperation of autophagy and ER stress by targeting ", *Autophagy*, 2017  
出版物 <1 %

---

29 [jcancer.org](http://jcancer.org)  
网际网络来源 <1 %

---

30 [www.spandidos-publications.com](http://www.spandidos-publications.com)  
网际网络来源 <1 %

---

31 Defeng Li, Meifeng Yang, Aijun Liao, Bing Zeng et al. "Linc00483 as ceRNA regulates <1 %



proliferation and apoptosis through activating MAPKs in gastric cancer", Journal of Cellular and Molecular Medicine, 2018

出版物

32

Xiaomin Li, Jianjun Wang, Chao Zhang, Chun Lin, Jianming Zhang, Wei Zhang, Wenjuan Zhang, Yanxia Lu, Lin Zheng, Xuenong Li. "Circular RNA circITGA7 inhibits colorectal cancer growth and metastasis by modulating the Ras pathway and upregulating transcription of its host gene ", The Journal of Pathology, 2018

出版物

<1 %

33

[academic.oup.com](https://academic.oup.com)

网际网络来源

<1 %

34

Jiacheng Cao, Xing Zhang, Penghui Xu, Haixiao Wang et al. "Circular RNA circLMO7 acts as a microRNA-30a-3p sponge to promote gastric cancer progression via the WNT2/ $\beta$ -catenin pathway", Journal of Experimental & Clinical Cancer Research, 2021

出版物

<1 %

35

[aging-us.com](https://aging-us.com)

网际网络来源

<1 %

36

Penghui Xu, Xing Zhang, Jiacheng Cao, Jing Yang et al. "The Therapeutic Effect of Circular RNA ST3GAL6 on Blocking GC Malignant Behaviors Through Autophagy Regulated by

<1 %

37

Yuan, Yunfeng, Yaxing Shen, Liang Xue, and Hong Fan. "miR-140 Suppresses Tumor Growth and Metastasis of Non-Small Cell Lung Cancer by Targeting Insulin-Like Growth Factor 1 Receptor", PLoS ONE, 2013.

出版物

---

<1 %

38

Qiuli Wang, Dong Liang, Peng Shen, Yang Yu, Yuan Yan, Wei You. "Hsa\_circ\_0092276 promotes doxorubicin resistance in breast cancer cells by regulating autophagy via miR-348/ATG7 axis", Translational Oncology, 2021

出版物

---

<1 %

39

Sen-Miao Tong, Ding-Yi Wang, Qing Cai, Sheng-Hua Ying, Ming-Guang Feng. "Opposite Nuclear Dynamics of Two FRH-Dominated Frequency Proteins Orchestrate Non-Rhythmic Conidiation in *Beauveria bassiana*", Cells, 2020

出版物

---

<1 %

40

Wei Liu, Weiming Ma, Yuan Yuan, Youwei Zhang, Sanyuan Sun. "Circular RNA hsa\_circRNA\_103809 promotes lung cancer progression via facilitating ZNF121-dependent MYC expression by sequestering miR-4302",

<1 %

# Biochemical and Biophysical Research Communications, 2018

出版物

41

[www.tandfonline.com](http://www.tandfonline.com)

网际网络来源

<1 %

42

Feige Nian, Jing Zhu, Haining Chang. "Long non-coding RNA ANGPTL1-3 promotes multiple myeloma bortezomib resistance by sponging miR-30a-3p to activate c-Maf expression", Biochemical and Biophysical Research Communications, 2019

出版物

<1 %

43

Jensen, Gasim, Ismail, Gaafar, Kurtzhals, Kemp, El Hassan, Kharazmi, Theander. "Humoral and Cellular Immune Responses to Synthetic Peptides of the Kinetoplastid Membrane Protein\_11 ", Scandinavian Journal of Immunology, 2008

出版物

<1 %

44

Tingting An, Tianxiu Dong, Haoxin Zhou, Yaodong Chen, Jiuwei Zhang, Yu Zhang, Zizhuo Li, Xiuhua Yang. "The transcription factor Krüppel-like factor 5 promotes cell growth and metastasis via activating PI3K/AKT/Snail signaling in hepatocellular carcinoma", Biochemical and Biophysical Research Communications, 2019

出版物

<1 %

45

[Www.ijbs.com](http://www.ijbs.com)

网际网络来源

&lt;1 %

46

Jing Lin, Shasha Liao, E. Li, Zewa Liu, Ruihua Zheng, Xiaohua Wu, Wanting Zeng.

"circCYFIP2 Acts as a Sponge of miR-1205 and Affects the Expression of Its Target Gene E2F1 to Regulate Gastric Cancer Metastasis", Molecular Therapy - Nucleic Acids, 2020

出版物

&lt;1 %

47

Dandan Li, Li Shen, Mengjie Xu, Xudong Zhang, Zhen Chen, Pan Huang, Congcong Huang, Shanshan Qin. "The SNAI2-ELF3-AS1 Feedback Loop Drives Gastric Cancer Metastasis and Regulates ELF3 Expression At Transcriptional and Post-Transcriptional Levels", Research Square Platform LLC, 2021

出版物

&lt;1 %

48

Huanji Xu, Sheng Zhou, Qiulin Tang, Hongwei Xia, Feng Bi. "Cholesterol metabolism: New functions and therapeutic approaches in cancer", Biochimica et Biophysica Acta (BBA) - Reviews on Cancer, 2020

出版物

&lt;1 %

49

Richard Greil, Evelyn Hutterer, Tanja Nicole Hartmann, Lisa Pleyer. "Reactivation of dormant anti-tumor immunity – a clinical perspective of therapeutic immune

&lt;1 %

# checkpoint modulation", Cell Communication and Signaling, 2017

出版物

50

Tingting Wang, Zhenchuan Liu, Yunlang She, Jiajun Deng et al. "A novel protein encoded by circASK1 ameliorates gefitinib resistance in lung adenocarcinoma by competitively activating ASK1-dependent apoptosis", Cancer Letters, 2021

出版物

<1 %

51

YanJun Chen, Jiayu Wang, Juntao Li, Jinghan Zhu, Ruoqin Wang, Qinhua Xi, Hongya Wu, Tongguo Shi, Weichang Chen. "Astragalus polysaccharide prevents ferroptosis in a murine model of experimental colitis and human Caco-2 cells via inhibiting NRF2/HO-1 pathway", European Journal of Pharmacology, 2021

出版物

<1 %

52

[jneuroinflammation.biomedcentral.com](http://jneuroinflammation.biomedcentral.com)

网际网络来源

<1 %

53

[journals.lww.com](http://journals.lww.com)

网际网络来源

<1 %

54

[www.researchsquare.com](http://www.researchsquare.com)

网际网络来源

<1 %

55

Chen Lu, Dawei Rong, Bingqing Hui, Xuezhi He, Wei Jiang, Yetao Xu, Hongyong Cao,

<1 %

Zekuan Xu, Weiwei Tang. "CircETFA upregulates CCL5 by sponging miR-612 and recruiting EIF4A3 to promote hepatocellular carcinoma", Cell Death Discovery, 2021

出版物

56

Hong Mai, Yan Liao, Sufang Luo, Kaiyi Wei, Feng Yang, Haijuan Shi. "Histone deacetylase HDAC2 silencing prevents endometriosis by activating the HNF4A/ARID1A axis", Journal of Cellular and Molecular Medicine, 2021

出版物

<1 %

57

James R Hill, Xia Shao, Jay S. Wright, Jenelle Stauff et al. " Synthesis and evaluation of C- and F-labeled SOAT1 inhibitors as macrophage foam cell imaging agents ", ACS Medicinal Chemistry Letters, 2020

出版物

<1 %

58

Kaixuan Zeng, Xiaoxiang Chen, Mu Xu, Xiangxiang Liu, Xiuxiu Hu, Tao Xu, Huiling Sun, Yuqin Pan, Bangshun He, Shukui Wang. "CircHIPK3 promotes colorectal cancer growth and metastasis by sponging miR-7", Cell Death & Disease, 2018

出版物

<1 %

59

Lei Xing, Rui Yang, Xiaosong Wang, Xiaying Zheng, Xin Yang, Luyu Zhang, Rong Jiang, Guosheng Ren, Junxia Chen. "The circRNA circIFI30 promotes progression of triple-

<1 %

negative breast cancer and correlates with prognosis", Aging, 2020

出版物

60

Xiaoxiang Chen, Kaixuan Zeng, Mu Xu, Xiuxiu Hu, Xiangxiang Liu, Tao Xu, Bangshun He, Yuqin Pan, Huiling Sun, Shukui Wang. "SP1-induced lncRNA-ZFAS1 contributes to colorectal cancer progression via the miR-150-5p/VEGFA axis", Cell Death & Disease, 2018

出版物

<1 %

61

coek.info

网际网络来源

<1 %

62

jeccr.biomedcentral.com

网际网络来源

<1 %

63

stemcellres.biomedcentral.com

网际网络来源

<1 %

64

www.medicinalgenomics.com

网际网络来源

<1 %

65

Fagen Li, Ke Cao, Maoyun Wang, Yi Liu, Yin Zhang. "Astragaloside IV exhibits anti-tumor function in gastric cancer via targeting circRNA dihydrolipoamide S-succinyltransferase (circDLST)/miR-489-3p/eukaryotic translation initiation factor 4A1(EIF4A1) pathway", Bioengineered, 2022

出版物

<1 %

66

&lt;1 %

67

Linyuan Xue, Hongyu Qi, He Zhang, Lu Ding, Qingxia Huang, Daqing Zhao, Boyang Jason Wu, Xiangyan Li. "Targeting SREBP-2-Regulated Mevalonate Metabolism for Cancer Therapy", *Frontiers in Oncology*, 2020

出版物

&lt;1 %

68

Peng-Fei Zhang, Yi-Fan Xu, Ling-Xian Zhang, Jing Wu, Yue Fan. "CircRUNX1 Drives Immune Evasion and anti-PD1 Immunotherapy Resistance in Lung Adenocarcinoma by the miR-4739/PCSK9/MHC I Axis", *Research Square Platform LLC*, 2021

出版物

&lt;1 %

69

Tomoko Kurata, Violeta Lukic, Miki Kozuki, Daisuke Wada et al. "Long-term Effect of Telmisartan on Alzheimer's Amyloid Genesis in SHR-SR After tMCAO", *Translational Stroke Research*, 2014

出版物

&lt;1 %

70

Xiaoling Cai, Xueying Gao, Wenjia Yang, Yifei Chen, Simin Zhang, Lingli Zhou, Xueyao Han, Linong Ji. "No disparity of the efficacy and all cause mortality between Asian and non-Asian type 2 diabetes patients with SGLT2 inhibitors treatment: A meta-analysis", *Journal of Diabetes Investigation*, 2017

&lt;1 %



---

71 Yanqing Feng, Gang Wei, Linfei Zhang, Huadong Zhou, Wei Wang, Peng Guo, Caitao Cheng, Lei Ji, Qinghe Cai, Yong Feng, Huahua Tu. "LncRNA DARS-AS1 aggravates the growth and metastasis of hepatocellular carcinoma via regulating the miR-3200-5p-Cytoskeleton associated protein 2 (CKAP2) axis", Bioengineered, 2021  
出版物

<1 %

---

72 Yaxin Guo, Yuying Guo, Chen Chen, Dandan Fan, Xiaoke Wu, Luyang Zhao, Bo Shao, Zhenqiang Sun, Zhenyu Ji. "Circ3823 contributes to growth, metastasis and angiogenesis of colorectal cancer: involvement of miR-30c-5p/TCF7 axis", Molecular Cancer, 2021  
出版物

<1 %

---

73 [patents.google.com](https://patents.google.com)  
网际网络来源

<1 %

---

74 [thno.org](https://thno.org)  
网际网络来源

<1 %

---

75 [www.hindawi.com](https://www.hindawi.com)  
网际网络来源

<1 %

---

76 Lin Li, Jinhai Gou, Tao Yi, Zhengyu Li. "MicroRNA-30a-3p regulates epithelial-mesenchymal transition to affect embryo

<1 %

# implantation by targeting Snai2<sup>+</sup>", Biology of Reproduction, 2019

出版物

77

Ruoqin Wang, Yanchao Ma, Shenghua Zhan, Guangbo Zhang, Lei Cao, Xueguang Zhang, Tongguo Shi, Weichang Chen. "B7-H3 promotes colorectal cancer angiogenesis through activating the NF-κB pathway to induce VEGFA expression", Cell Death & Disease, 2020

出版物

<1 %

78

Zeyou Guo, Luyang Zhao, Suhui Ji, Ting Long, Yanling Huang, Rui Ju, Wei Tang, Weidong Tian, Jie Long. "CircRNA-23525 regulates osteogenic differentiation of adipose-derived mesenchymal stem cells via miR-30a-3p", Cell and Tissue Research, 2020

出版物

<1 %

79

Zihao Pan, Jianye Cai, Jiatong Lin, Huinian Zhou et al. "A novel protein encoded by circFNDC3B inhibits tumor progression and EMT through regulating Snail in colon cancer", Molecular Cancer, 2020

出版物

<1 %

80

A. Kolyada, Q. Ke, I. Karageorgos, P. Mahlawat, D. A. Barrios, P. M. Kang, N. Beglova. "Soluble analog of ApoER2 targeting beta2-glycoprotein I in immune complexes

<1 %

counteracts hypertension in lupus-prone mice with spontaneous antiphospholipid syndrome", Journal of Thrombosis and Haemostasis, 2016

出版物

---

81

Hanchen Xu, Yujing Liu, Peiqiu Cheng, Chunyan Wang, Yang Liu, Wenjun Zhou, Yangxian Xu, Guang Ji. "CircRNA\_0000392 promotes colorectal cancer progression through the miR-193a-5p/PIK3R3/AKT axis", Journal of Experimental & Clinical Cancer Research, 2020

出版物

---

<1 %

82

Hanqing Hong, Hai Zhu, Shujun Zhao, Kaili Wang et al. "The novel circCLK3/miR-320a/FoxM1 axis promotes cervical cancer progression", Cell Death & Disease, 2019

出版物

---

<1 %

83

Liang Chen, Ge Shan. "CircRNA in cancer: Fundamental mechanism and clinical potential", Cancer Letters, 2021

出版物

---

<1 %

84

Martínez-Oliván, Juan, Hugo Fraga, Xabier Arias-Moreno, Salvador Ventura, and Javier Sancho. "Intradomain Confinement of Disulfides in the Folding of Two Consecutive Modules of the LDL Receptor", PLoS ONE, 2015.

出版物

<1 %

85

Qiuling Niu, Zhijie Dong, Min Liang, Yuanwei Luo, Hai Lin, Mingzhen Lin, Xiu Zhong, Wenxia Yao, Jinsheng Weng, Xinke Zhou. "Circular RNA hsa\_circ\_0001829 promotes gastric cancer progression through miR-155-5p/SMAD2 axis", *Journal of Experimental & Clinical Cancer Research*, 2020

出版物

&lt;1 %

86

Ting-Chen Chang. "Effect of conjugated equine estrogen in combination with two different progestogens on the risk factors of coronary heart disease in postmenopausal Chinese women in Taiwan: a randomized one-year study", *Acta Obstetrica Et Gynecologica Scandinavica*, 7/2004

出版物

&lt;1 %

87

Yanchao Ma, Shenghua Zhan, Huimin Lu, Ruoqin Wang et al. "B7-H3 regulates KIF15-activated ERK1/2 pathway and contributes to radioresistance in colorectal cancer", *Cell Death & Disease*, 2020

出版物

&lt;1 %

88

Yoshitoshi Ichikawa, Hidekazu Takahashi, Yoshinao Chinen, Asami Arita et al. "Low G9a expression is a tumor progression factor of colorectal cancer via IL-8 promotion", *Carcinogenesis*, 2022

出版物

&lt;1 %

89

Yuanfang Li, Pengtao Yuan, Shengxin Fan, Bin Zhai et al. "miR-30a-3p can inhibit the proliferation and promote the differentiation of chicken primary myoblasts", British Poultry Science, 2022

出版物

<1 %

90

Zhenqiang Sun, Chunlin Ou, Weiguo Ren, Xiang Xie, Xiayu Li, Guiyuan Li. "Downregulation of long non-coding RNA ANRIL suppresses lymphangiogenesis and lymphatic metastasis in colorectal cancer", Oncotarget, 2016

出版物

<1 %

不含引文

关闭

不含相符结果

关闭

排除参考书目

开
