# Supplementary material for: Circular RNA circLDLR facilitates cancer progression by altering the miR-30a-3p/SOAT1 axis in colorectal cancer
Source: PubMed Central journal article supplement (PMC9276972; doi:10.1038/s41420-022-01110-5), 2022-07-11
Supplement: 41420_2022_1110_MOESM16_ESM.pdf [file 41420_2022_1110_MOESM16_ESM.pdf]

# DECLARATION OF CONTRIBUTIONS TO ARTICLE

# ADMC

Manuscript Number:

CDDISCOVERY-22-3918R1

Journal Name:

Cell Death Discovery

(the 'Journal')

Proposed Title of the Contribution:

Circular RNA circLDLR facilitates cancer progression by altering the miR-30a-3p/SOAT1 axis in colorectal cancer

(the 'Contribution')

Author(s):

Ruoqin Wang, Jiayu Wang, Yanjun Chen, Yuqi Chen, Qinhu Xi, Linqing Sun, Xueguang Zhang, Guangbo Zhang, Xianglin Ding, Tongguo Shi, Weichang Chen

(the 'Authors')

For all *Cell Death Discovery* articles, each person named as an author in the published version must be able to show he or she has contributed substantially to the article.

Authorship credit should be based on 1) substantial contributions to conception and design, acquisition of data, or analysis and interpretation of data; 2) drafting the article or revising it critically for important intellectual content; and 3) final approval of the version to be published. Authors should meet conditions 1, 2 and 3.

Any person who cannot be shown to have made a substantial contribution to the article cannot be listed as an author in the final version. The name of any person who is deemed to have made a minor contribution can, however, appear in the Acknowledgments section of the article.

Please complete the table below to indicate the contributions of all named authors to the manuscript.

| Author Full Name: | Specification of Contribution to the Manuscript:                                 |
|-------------------|----------------------------------------------------------------------------------|
| Ruoqin Wang       | acquisition of data, drafting the article                                        |
| Jiayu Wang        | acquisition of data                                                              |
| Yanjun Chen       | collected clinical samples                                                       |
| Yuqi Chen         | collected clinical samples                                                       |
| Qinhua Xi         | analysis and interpretation of data                                              |
| Linqing Sun       | analysis and interpretation of data                                              |
| Xueguang Zhang    | conception and design, revising it critically for important intellectual content |
| Guangbo Zhang     | conception and design, final approval of the version to be published             |
| Xianglin Ding     | conception and design, revising it critically for important intellectual content |
| Tongguo Shi       | conception and design, revising it critically for important intellectual content |
| Weichang Chen     | conception and design, revising it critically for important intellectual content |
|                   |                                                                                  |
|                   |                                                                                  |

Please complete the table below to indicate the contributions of all named authors to the figures.

Figure 1:

Ruoqin Wang, Jiayu Wang, Yanjun Chen, Yuqi Chen, Xianglin Ding, Tongguo Shi, Weichang Chen

Figure 2:

Ruoqin Wang, Jiayu Wang, Yanjun Chen, Yuqi Chen, Xianglin Ding, Tongguo Shi, Weichang Chen

Figure 3-5:

Ruoqin Wang, Jiayu Wang, Qinhua Xi, Linqing Sun, Guangbo Zhang, Xueguang Zhang, Xianglin Ding, Tongguo Shi, Weichang Chen

Figure 6:

Ruoqin Wang, Qinhua Xi, Linqing Sun, Guangbo Zhang, Weichang Chen

Figure 7:

Ruoqin Wang, Yanjun Chen, Yuqi Chen, Guangbo Zhang, Weichang Chen

Figure 8:

Ruoqin Wang, Jiayu Wang, Tongguo Shi, Weichang Chen

Signed for and on behalf of the Author(s):

*Tongguo Shi*

Print Name:

Tongguo Shi

Date:

June 24, 2022
